# Supplementary material for: Fermentation based carbon nanotube multifunctional bionic composites
Source: Sci Rep. 2016 Jun 9;6:27031. doi: 10.1038/srep27031 (PMC4899685; doi:10.1038/srep27031)
Supplement: Supplementary Information [file srep27031-s1.pdf]

# Fermentation based carbon nanotube multifunctional bionic composites

## Supporting Information

Luca Valentini,<sup>1,\*</sup> Silvia Bittolo Bon,<sup>1</sup> Stefano Signetti,<sup>2</sup> Manoj Tripathi,<sup>3</sup> Erica Iacob,<sup>3</sup> Nicola M. Pugno<sup>2,3,4,\*</sup>

<sup>1</sup> *Dipartimento di Ingegneria Civile e Ambientale, Università di Perugia, UdR INSTM, Strada di Pentima 4, I-05100 Terni - Italy.*

<sup>2</sup> *Laboratory of Bio-Inspired and Graphene Nanomechanics, Department of Civil, Environmental and Mechanical Engineering, University of Trento, via Mesiano 77, I-38123 Trento, Italy*

<sup>3</sup> *Centre for Materials and Microsystems, Fondazione Bruno Kessler, via Sommarive 18, I-38123 Povo (Trento), Italy*

<sup>4</sup> *School of Engineering and Materials Science, Queen Mary University of London, Mile End Road, E1 4NS London, United Kingdom.*

Corresponding authors:

Luca Valentini: Tel: +39 0744 492924; E-mail: [luca.valentini@unipg.it](mailto:luca.valentini@unipg.it)

Nicola M. Pugno: Tel: +39 0461 282525; E-mail: [nicola.pugno@unitn.it](mailto:nicola.pugno@unitn.it)

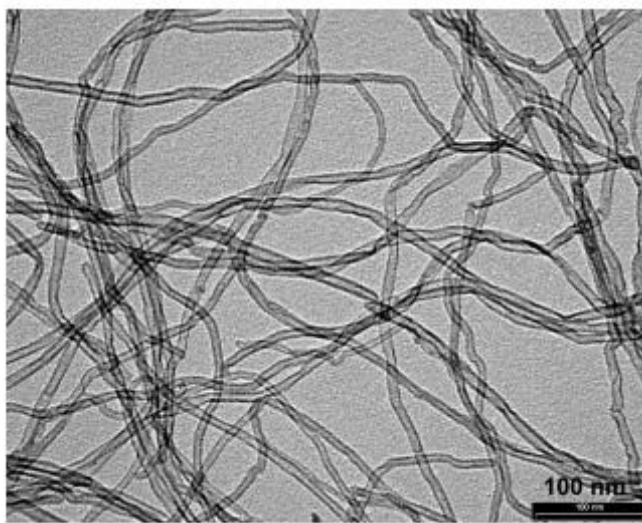

**Figure S1.** TEM image of multi-walled carbon nanotubes (source [www.nanocyl.com](http://www.nanocyl.com)).

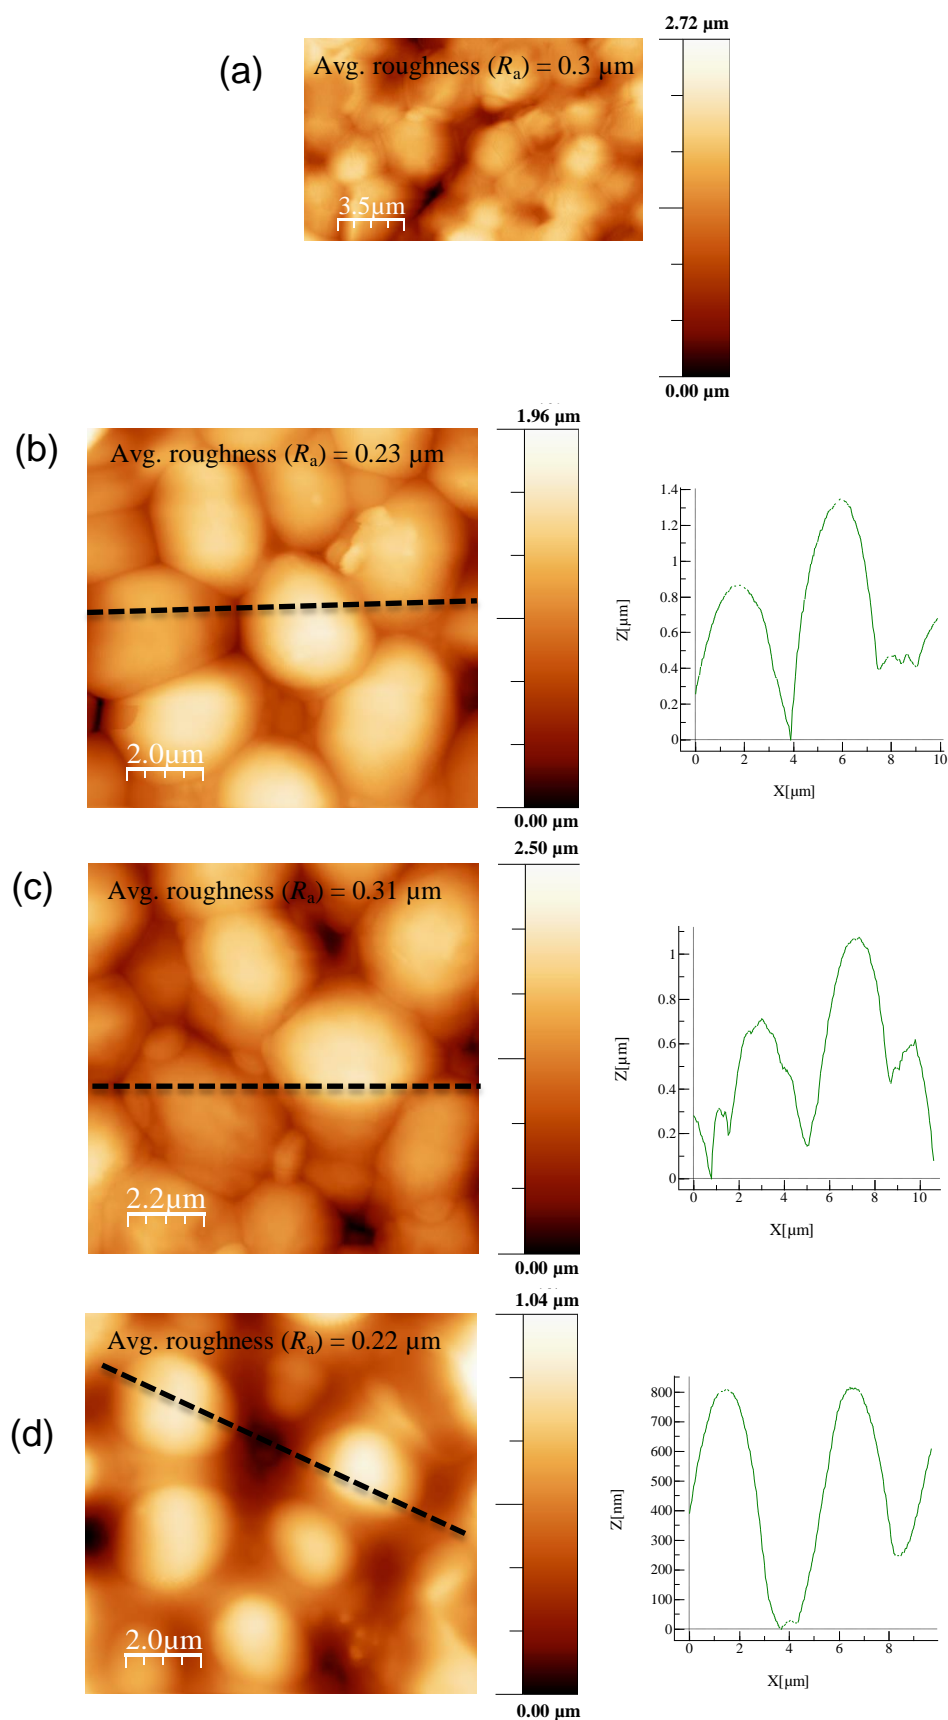

**Figure S2.** AFM images, average surface roughness ( $R_a$ ) and surface profiles of (a) neat yeast, (b) fermented yeast, (c) yeast/CNTs and (d) fermented yeast/CNTs composite films.

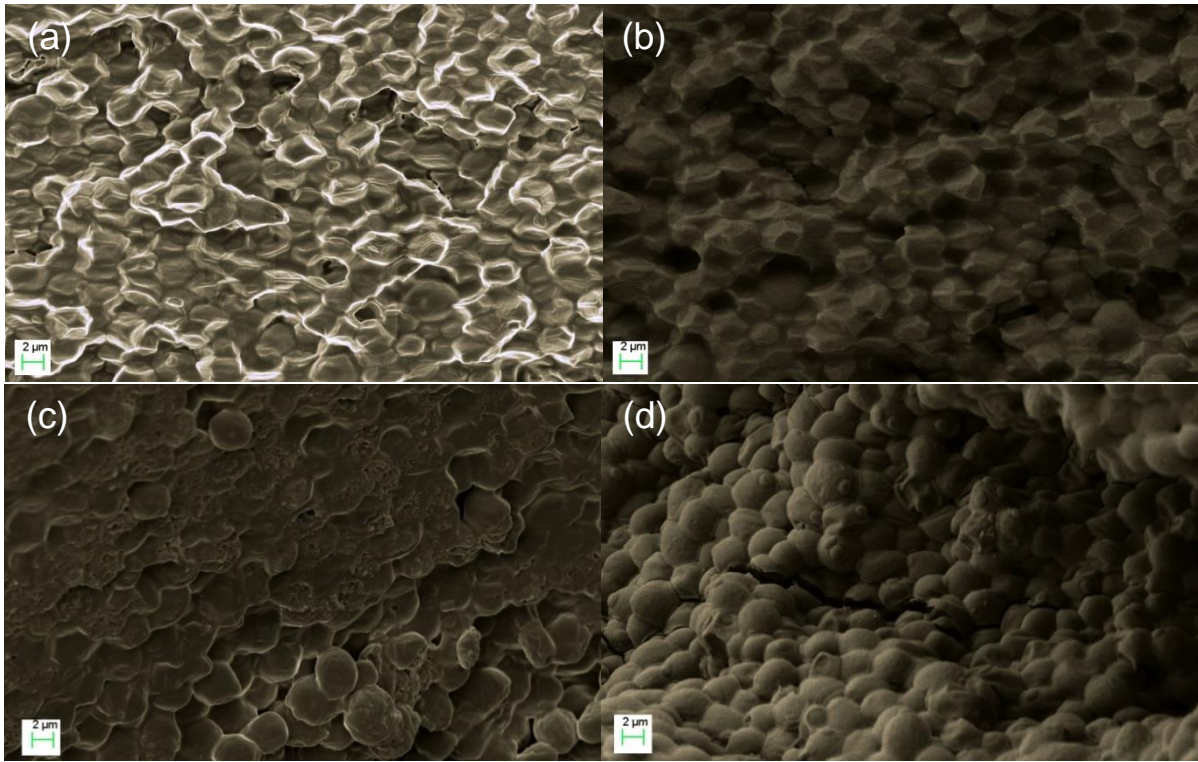

**Figure S3.** Cross section FESEM images of (a) neat yeast without fermentation, (b) yeast/CNTs without fermentation, (c) fermented yeast and (d) fermented yeast/CNTs films.

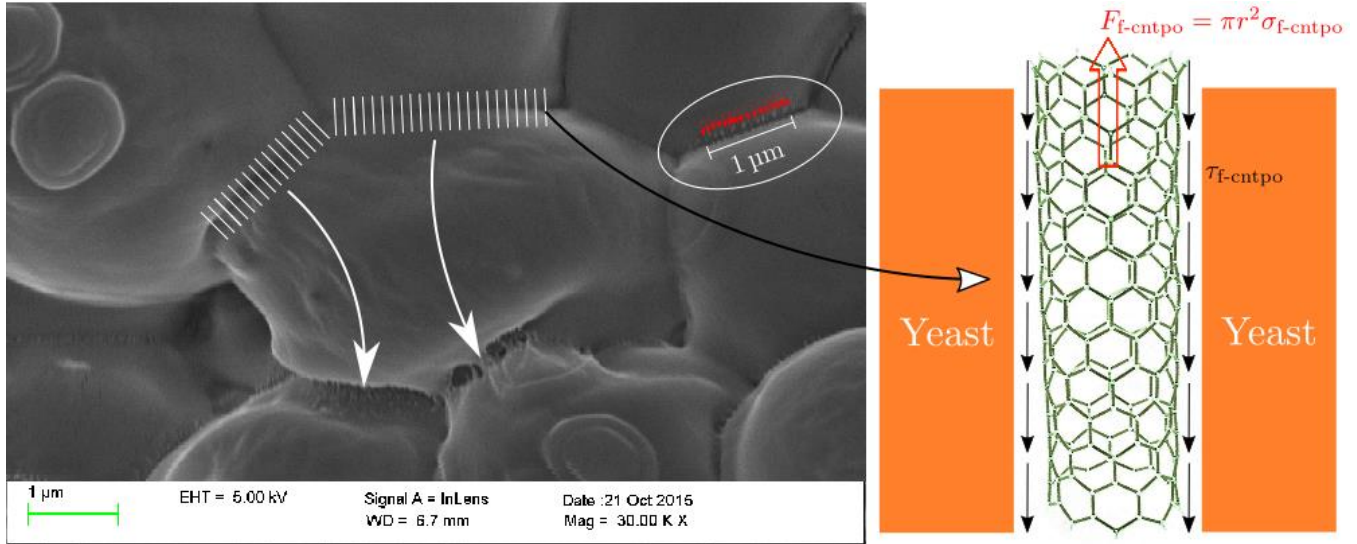

**Figure S4.** Schematic view of the crack bridging effect on a SEM image of the fermented yeast and pull-out mechanism. Encircled the interface at which the CNTs volume fraction was estimated by computing the number of CNTs  $n$  along a length of  $1 \mu\text{m}$  (here  $n = 17$ ). Assuming  $n^2$  CNTs of  $4.7 \text{ nm}$  radius  $r$  over a  $1 \mu\text{m}^2$  interface area  $f$  is computed as areal ratio. Since CNT are multi-walled with each wall  $0.34 \text{ nm}$  thick, the total area is approximated as full section of area  $\pi r^2$ .

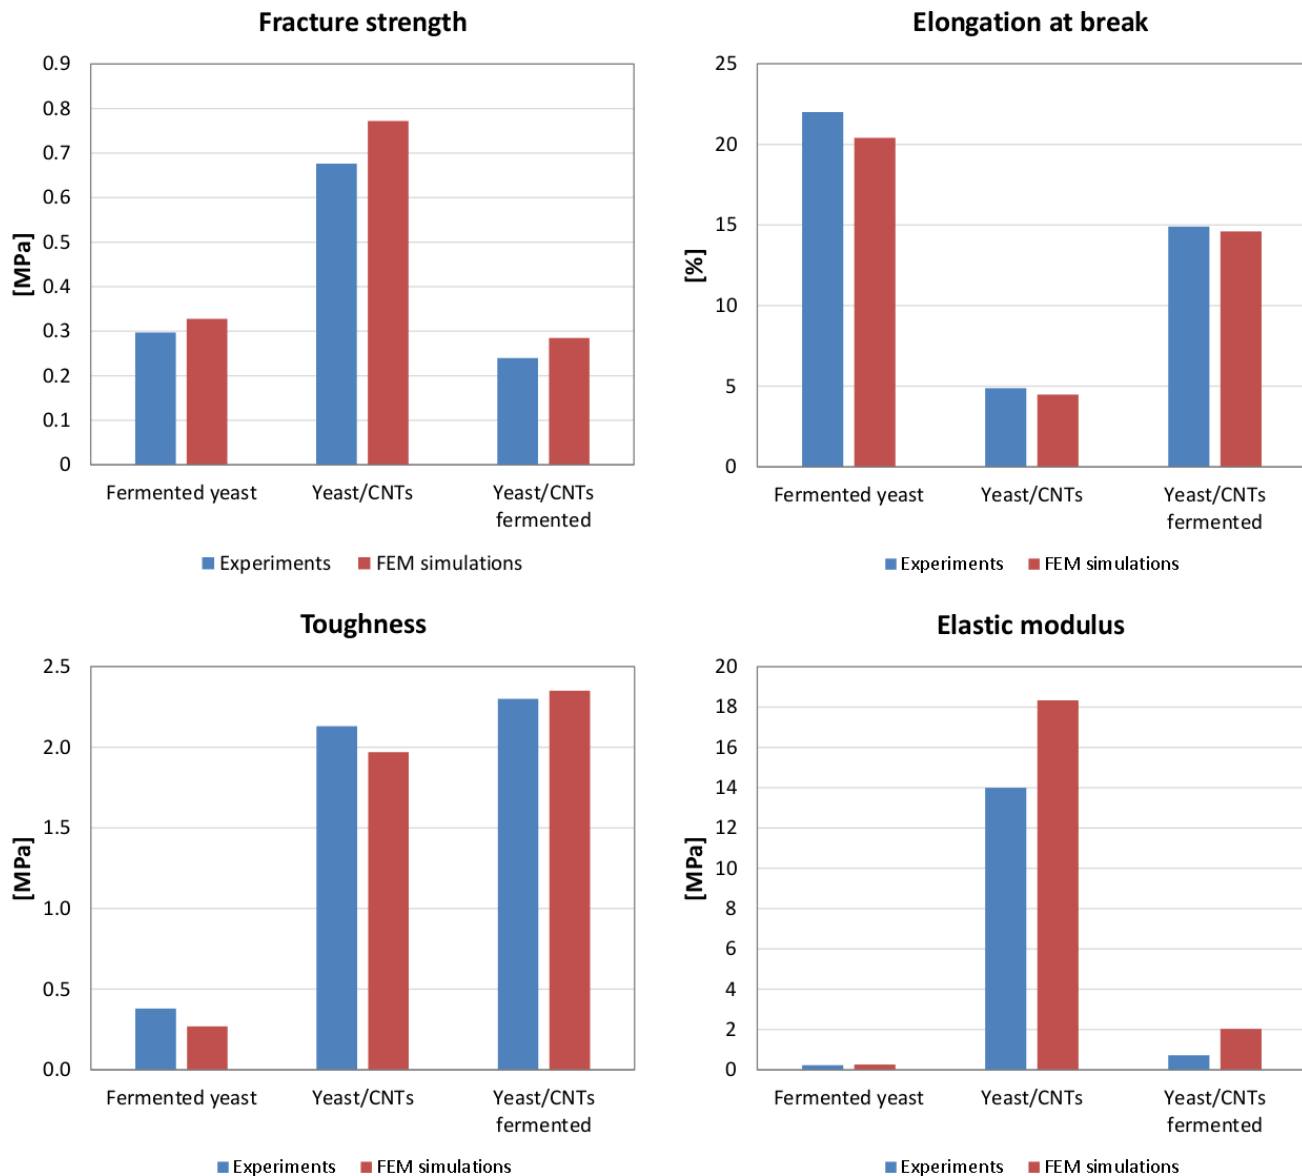

**Figure S5.** Characteristic parameters of the fermented yeast and of fermented yeast/CNTs composite before and after fermentation determined from the experimental constitutive curves and FEM simulations on the two-cell system (Figure 4). The fracture strength, toughness and elastic modulus of the fermented yeast sample are expressed in  $10^{-1}$  MPa.

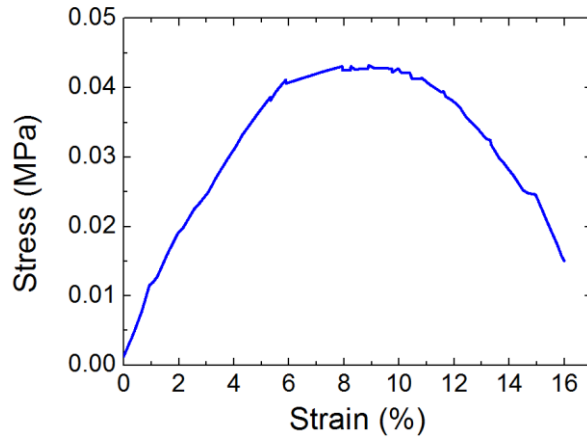

**Figure S6.** Stress-strain curve obtained from tensile tests on neat yeast film without fermentation.

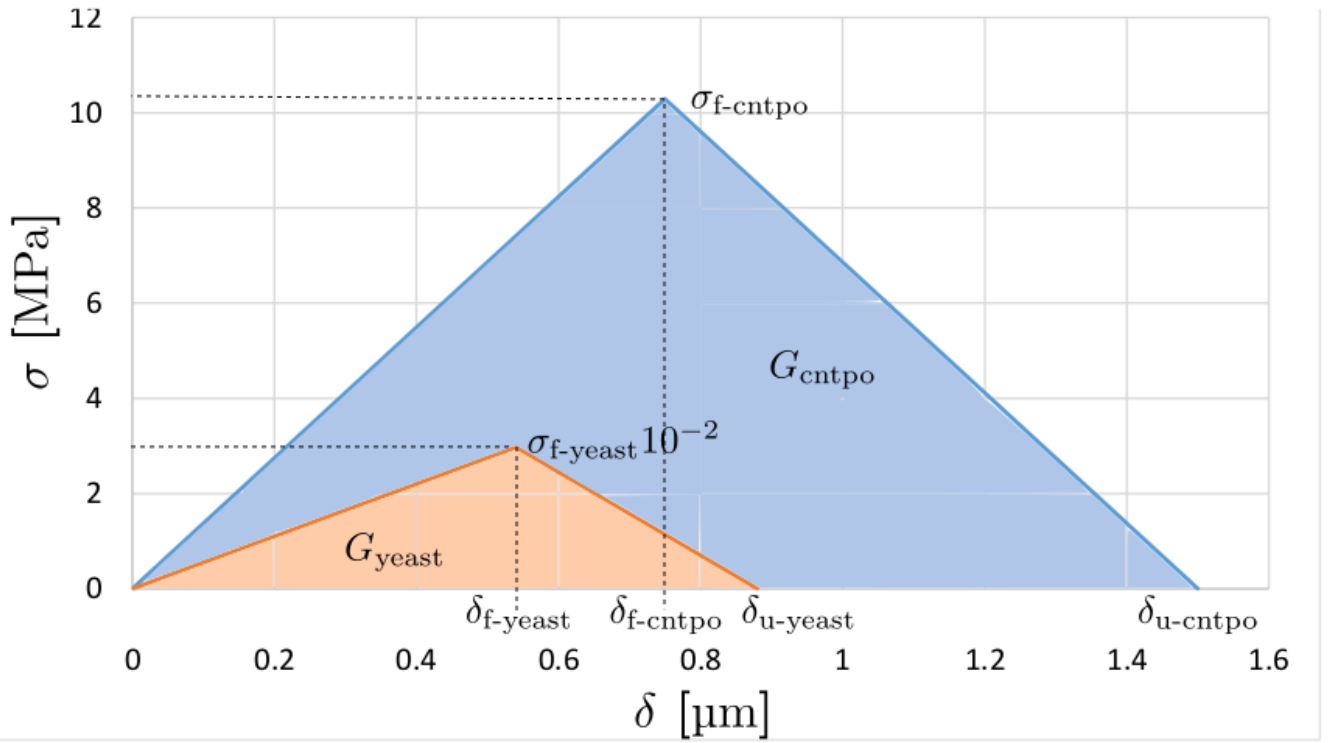

**Figure S7.** Cohesive laws for the yeast-yeast interface and CNTs pull out fraction

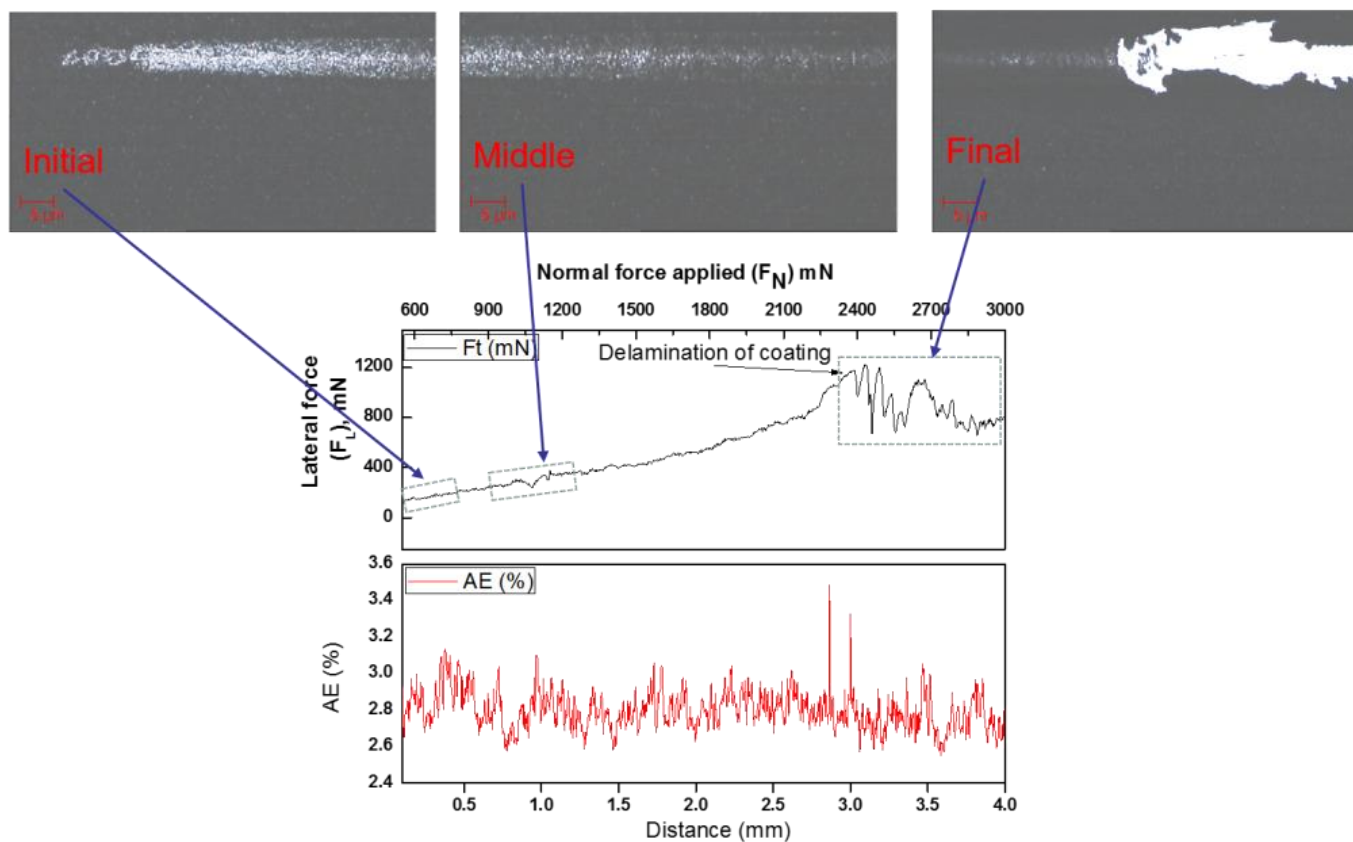

**Figure S8.** Lateral force, acoustic emission and delamination region of fermented yeast/CNTs composite film.
